# Supplementary material
Source: publisher site journal article supplement (https://content.cld.iop.org/journals/1748-9326/16/3/035018/revision4/erlabe829supp1.pdf)
Supplement: Supplementary file 1 [file erlabe829supp1.pdf]

# Is the efficacy of satellite-based inversion of SO<sub>2</sub> emission model dependent?

Nan Li <sup>1</sup>, Keqin Tang <sup>1</sup>, Yi Wang <sup>2</sup>, Jun Wang <sup>2</sup>, Weihang Feng <sup>1</sup>, Haoran Zhang <sup>1</sup>, Hong Liao <sup>1</sup>, Jianlin Hu <sup>1</sup>, Xin Long <sup>3</sup>, Chong Shi <sup>4</sup>, Xiaoli Su <sup>5</sup>

<sup>1</sup>Jiangsu Key Laboratory of Atmospheric Environment Monitoring and Pollution Control, Jiangsu Collaborative Innovation Center of Atmospheric Environment and Equipment Technology, School of Environmental Science and Engineering, Nanjing University of Information Science & Technology, Nanjing, 210044, China

<sup>2</sup>Center of Global and Regional Environmental Research, Department of Chemical and Biochemical Engineering, University of Iowa, Iowa City, Iowa, USA

<sup>3</sup>School of Environment Science and Engineering, Southern University of Science and Technology, Shenzhen, 518055, China

<sup>4</sup>Japan Aerospace Exploration Agency, Earth Observation Research Center, 2-1-1, Sengen, Tsukuba, Ibaraki, Japan

<sup>5</sup>Key Lab of Aerosol Chemistry & Physics, SKLLQG, Institute of Earth Environment, Chinese Academy of Sciences, Xi'an, 710061, China

*Correspondence to:*

*Nan Li, [linan@nuist.edu.cn](mailto:linan@nuist.edu.cn)*

*Yi Wang, [yi-wang-4@uiowa.edu](mailto:yi-wang-4@uiowa.edu)*

*Jun Wang, [jun-wang-1@uiowa.edu](mailto:jun-wang-1@uiowa.edu)*

**Table S1.** Model settings in different simulation scenarios

| Meteorology field |             | Gaseous chemistry                                                                                                                                                                               | Aerosol chemistry                                                                                                                   | Dry and wet depositions                               |
|-------------------|-------------|-------------------------------------------------------------------------------------------------------------------------------------------------------------------------------------------------|-------------------------------------------------------------------------------------------------------------------------------------|-------------------------------------------------------|
| GEOS-Chem         | GEOS-5      | NO <sub>x</sub> -O <sub>x</sub> -Hydrocarbon-Aerosol mechanism<br>Explicit mechanism, including 116 species and 311 reactions.<br>The globchem.dat file in GEOS-Chem adjoint v35d run directory | RPMARES<br>3 modes: aitken, accumulation and coarse<br>Binkowski et al., 2003                                                       | Wang et al., 1998<br>Wesely, 1989<br>Liu et al., 2001 |
|                   | Online WRF  | RADM2<br>Lumped mechanism, including 63 species and 145 reactions, VOC species are categorized based on their reactivity with OH radical<br>Stockwell et al., 1990                              | SORGAM<br>3 modes: aitken, accumulation and coarse<br>Schell et al., 2001                                                           | Easter et al., 2004<br>Zaveri et al., 2005            |
| WRF-Chem          | Online WRF  | SAPRC99<br>Lumped mechanism, including 74 species and 211 reactions, VOC species are categorized based on their reactivity with OH radical<br>Carter et al., 2000a<br>Carter et al., 2000b      | MOSAIC<br>8-bin: from 0.04 $\mu\text{m}$ to 10 $\mu\text{m}$<br>Zaveri et al., 2008                                                 | Easter et al., 2004<br>Zaveri et al., 2005            |
|                   | Online WRF  | SAPRC99<br>Lumped mechanism, including 74 species and 211 reactions, VOC species are categorized based on their reactivity with OH radical<br>Carter et al., 2000a<br>Carter et al., 2000b      | MOSAIC<br>+ heterogeneous sulfate<br>8-bin: from 0.04 $\mu\text{m}$ to 10 $\mu\text{m}$<br>Zaveri et al., 2008<br>Wang et al., 2016 | Easter et al., 2004<br>Zaveri et al., 2005            |
| CMAQ              | Offline WRF | SAPRC11<br>Lumped mechanism, including 139 species and 351 reactions, VOC species are categorized based on their reactivity with OH radical<br>Carter and Heo, 2012                             | AERO6<br>3 modes: aitken, accumulation and coarse<br>Carlton et al., 2010                                                           | Foley et al., 2010                                    |

**Table S2.** Observed and simulated vertical column SO<sub>2</sub> (DU), surface SO<sub>2</sub> (ppb) and AOD.

|                                              | Observation | Prior             |                     |                             |                 | Posterior         |                     |                             |                 |
|----------------------------------------------|-------------|-------------------|---------------------|-----------------------------|-----------------|-------------------|---------------------|-----------------------------|-----------------|
|                                              |             | WRF-Chem<br>RADM2 | WRF-Chem<br>SAPRC99 | WRF-Chem<br>SAPRC99-<br>het | CMAQ<br>SAPRC11 | WRF-Chem<br>RADM2 | WRF-Chem<br>SAPRC99 | WRF-Chem<br>SAPRC99-<br>het | CMAQ<br>SAPRC11 |
| <b><i>Vertical column SO<sub>2</sub></i></b> |             |                   |                     |                             |                 |                   |                     |                             |                 |
| Jan                                          | 0.30        | 1.27              | 1.20                | 1.09                        | 0.92            | 0.51              | 0.47                | 0.42                        | 0.48            |
| Apr                                          | 0.19        | 0.74              | 0.65                | 0.61                        | 0.82            | 0.34              | 0.29                | 0.27                        | 0.41            |
| Jul                                          | 0.14        | 0.51              | 0.50                | 0.50                        | 0.75            | 0.23              | 0.23                | 0.22                        | 0.32            |
| Oct                                          | 0.22        | 0.86              | 0.79                | 0.73                        | 0.87            | 0.44              | 0.37                | 0.35                        | 0.44            |
| Annual                                       | 0.21        | 0.84              | 0.79                | 0.73                        | 0.84            | 0.38              | 0.34                | 0.31                        | 0.41            |
| <b><i>Surface SO<sub>2</sub></i></b>         |             |                   |                     |                             |                 |                   |                     |                             |                 |
| Jan                                          | 22.2        | 33.7              | 34.2                | 33.1                        | 40.3            | 13.0              | 13.0                | 12.6                        | 20.7            |
| Apr                                          | 12.9        | 21.6              | 21.7                | 21.2                        | 31.5            | 9.9               | 9.8                 | 9.6                         | 13.0            |
| Jul                                          | 9.2         | 21.5              | 20.1                | 20.6                        | 23.2            | 10.1              | 9.6                 | 9.5                         | 12.1            |
| Oct                                          | 12.7        | 26.3              | 26.0                | 25.4                        | 36.4            | 12.1              | 11.9                | 11.7                        | 17.1            |
| Annual                                       | 14.3        | 25.8              | 25.5                | 25.1                        | 32.9            | 11.3              | 11.1                | 10.8                        | 15.7            |
| <b><i>AOD</i></b>                            |             |                   |                     |                             |                 |                   |                     |                             |                 |
| Jan                                          | 0.27        | 0.30              | 0.30                | 0.30                        | 0.33            | 0.29              | 0.29                | 0.30                        | 0.33            |
| Apr                                          | 0.51        | 0.56              | 0.56                | 0.57                        | 0.50            | 0.54              | 0.55                | 0.56                        | 0.49            |
| Jul                                          | 0.36        | 0.45              | 0.36                | 0.39                        | 0.44            | 0.41              | 0.35                | 0.36                        | 0.41            |
| Oct                                          | 0.27        | 0.31              | 0.33                | 0.34                        | 0.35            | 0.30              | 0.32                | 0.33                        | 0.34            |
| Annual                                       | 0.35        | 0.40              | 0.39                | 0.40                        | 0.40            | 0.39              | 0.38                | 0.39                        | 0.39            |

**Table S3.** Correlations of spatial distribution between GEOS-Chem result and other model results using prior SO<sub>2</sub> emissions.

|                                       | WRF-Chem<br>RADM2 | WRF-Chem<br>SAPRC99 | WRF-Chem<br>SAPRC99-het | CMAQ<br>SAPRC11 |
|---------------------------------------|-------------------|---------------------|-------------------------|-----------------|
| <i>Vertical column SO<sub>2</sub></i> |                   |                     |                         |                 |
| GEOS-Chem                             | 0.84              | 0.82                | 0.82                    | 0.82            |
| <i>Surface SO<sub>2</sub></i>         |                   |                     |                         |                 |
| GEOS-Chem                             | 0.67              | 0.66                | 0.66                    | 0.81            |

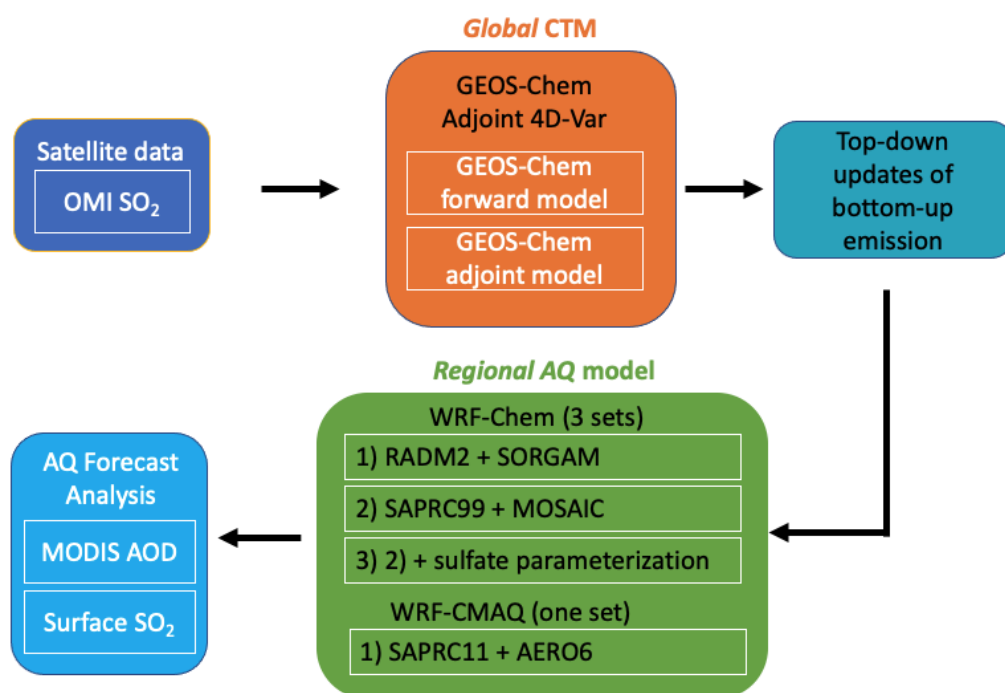

**Figure S1.** Framework of this study showing that the DA is conducted in one host model (GEOS-Chem) and the efficacy of the resultant top-down emissions are evaluated by two regional models that are different from the DA host model, WRF-Chem and WRF-CMAQ; for WRF-Chem, the evaluations are further conducted by using three sets of different chemistry mechanism.

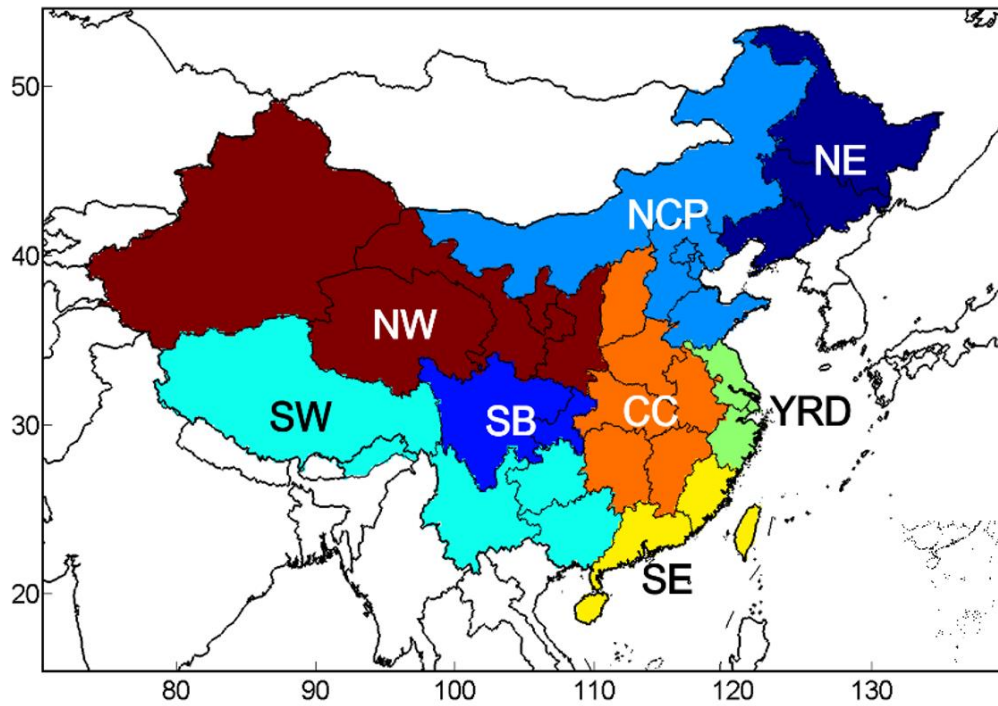

**Figure S2.** The model domain and region settings, including the Sichuan basin (SB), North China Plain (NCP), Central China (CC), Yangtze River Delta (YRD), Northwest China (NW), Northeast China (NE), Southwest China (SW), and Southeast China (SE).

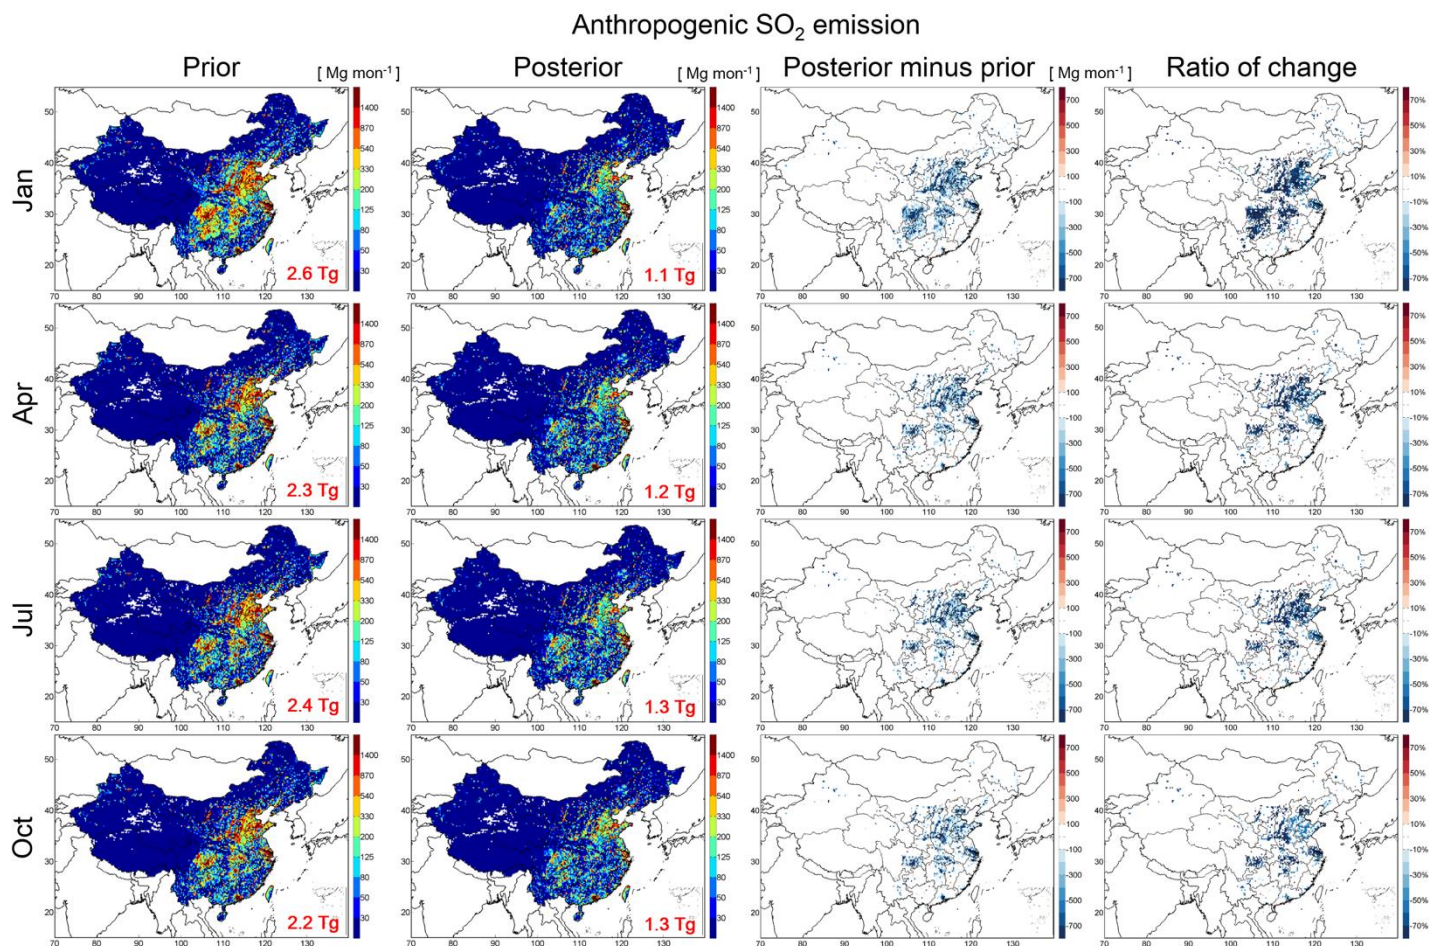

**Figure S3.** Monthly SO<sub>2</sub> emissions in 2009. The prior emission is from MEIC emission inventory, and the posterior emission is the satellite-constrained SO<sub>2</sub> emission using GEOS-Chem adjoint model. Regional emission totals are shown inset in red. The ratios of emission differences are shown in the grids where the differences are larger than 10 Mg mon<sup>-1</sup>.

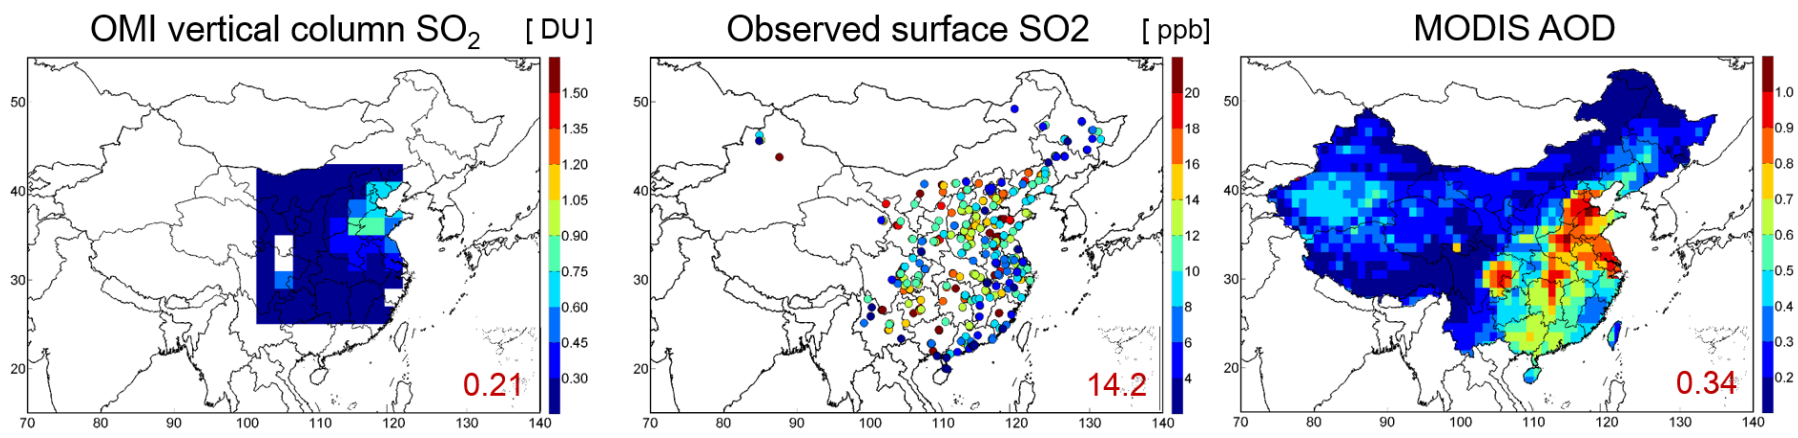

**Figure S4.** Annual vertical column SO<sub>2</sub> (DU) from OMI, surface SO<sub>2</sub> concentration from MEP observation network, and AOD from MODIS averaged for 2009.



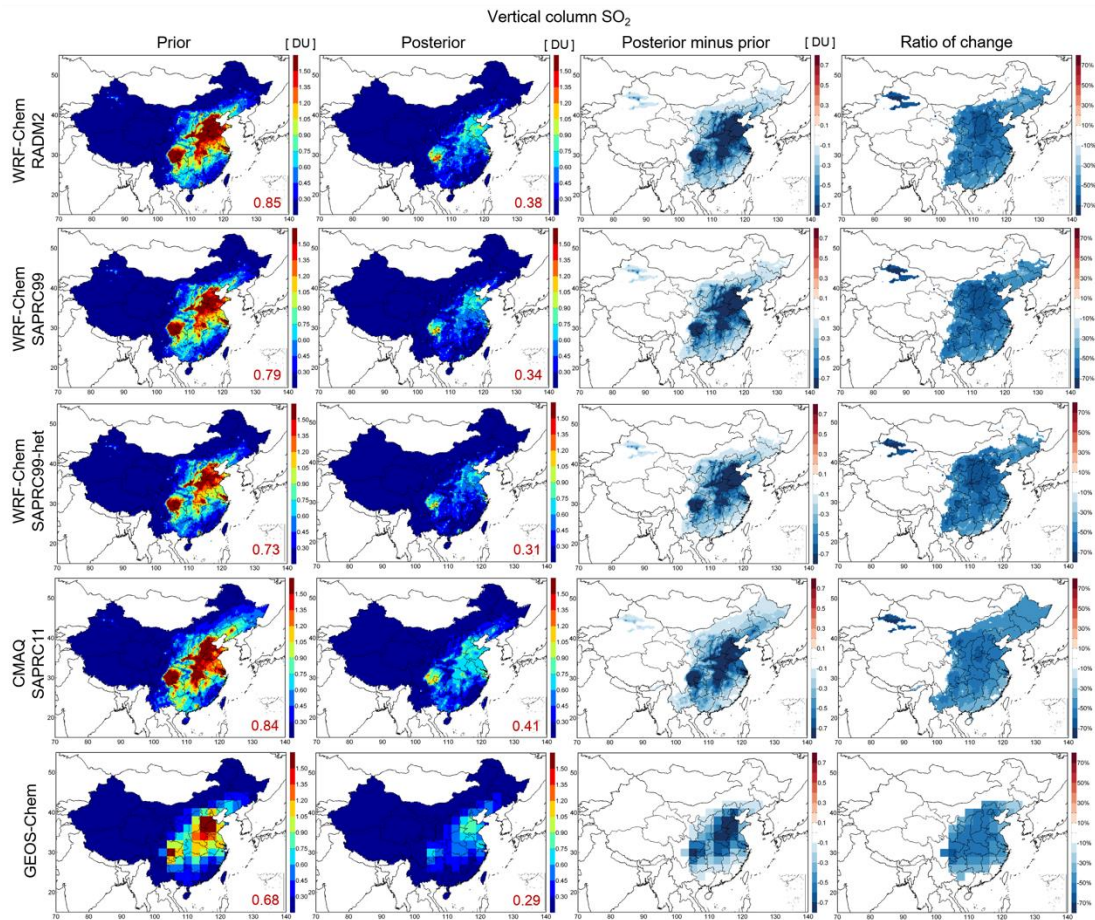

**Figure S5.** Annual vertical column SO<sub>2</sub> (DU) in China averaged for 2009. The left two columns are from prior and posterior simulations using different models and mechanisms and the right two columns are the differences between prior and posterior results. The ratios of differences are shown in the grids where the differences are larger than 0.1 DU.

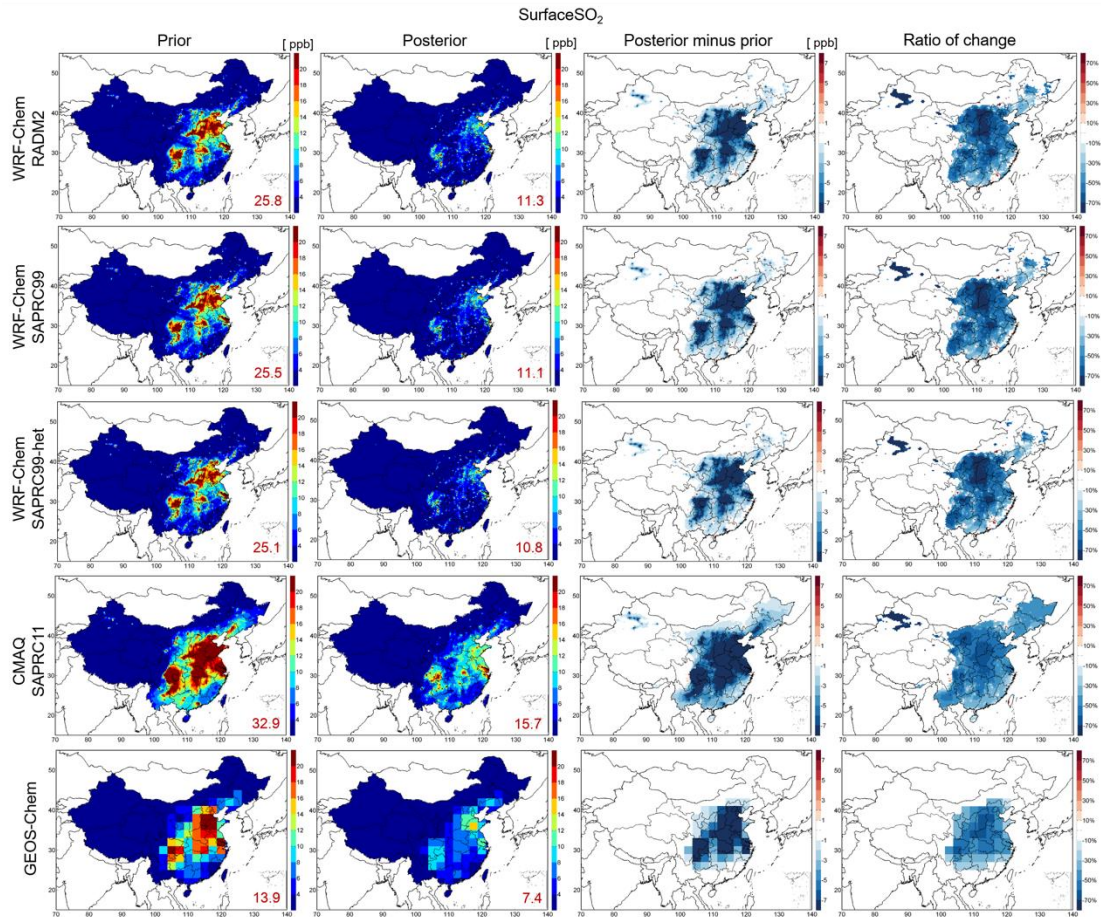

**Figure S6.** Annual surface SO<sub>2</sub> (ppb) in China averaged for 2009. The left two columns are from prior and posterior simulations using different models and mechanisms, and the right two columns are the differences between prior and posterior results. The ratios of differences are shown in the grids where the differences are larger than 1 ppb.

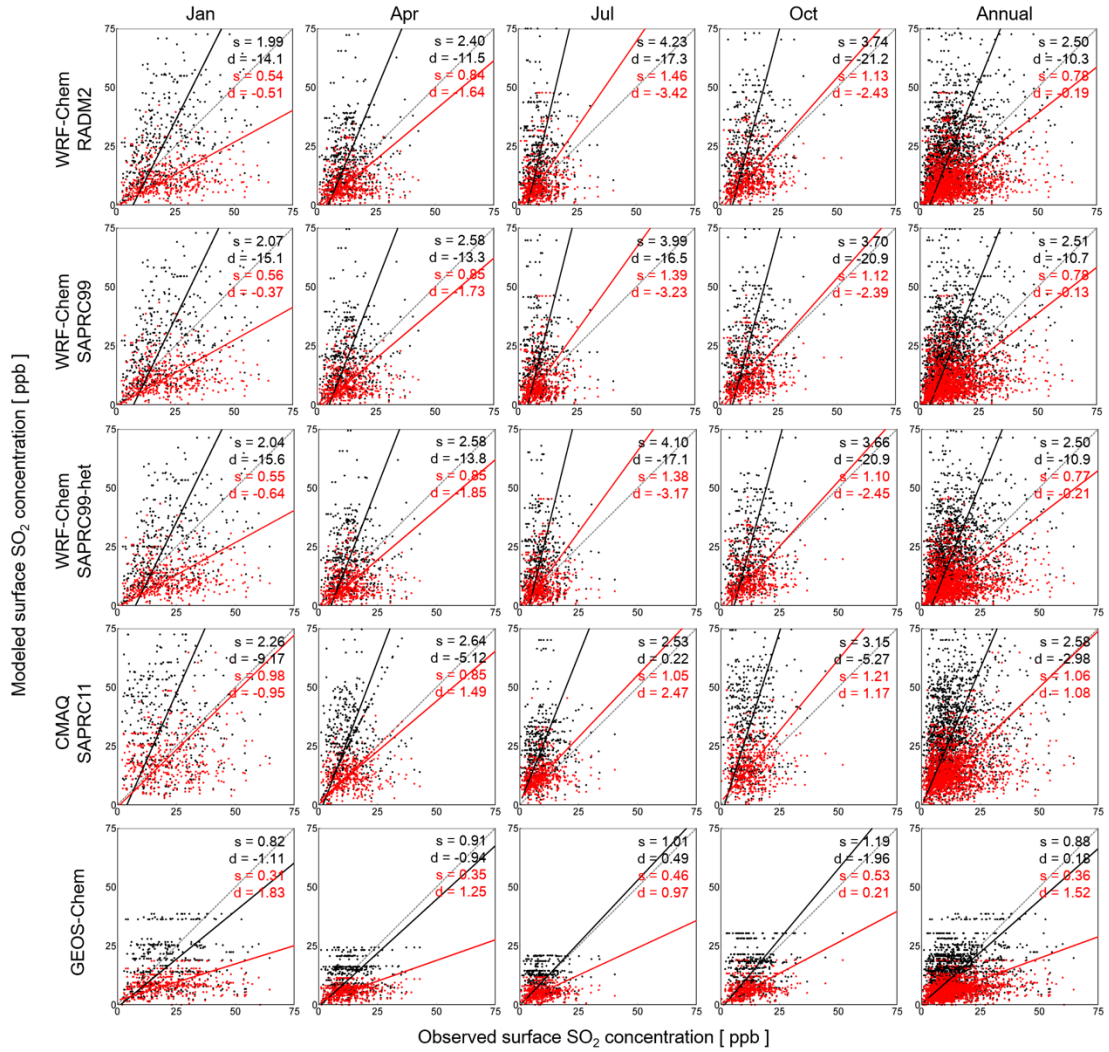

**Figure S7.** Scatter plot of simulated monthly mean surface SO<sub>2</sub> using prior (black) and posterior (red) emissions versus surface observations for January, April, July and October 2009. The slope (s) and intercept (d) of each trend line are also shown.

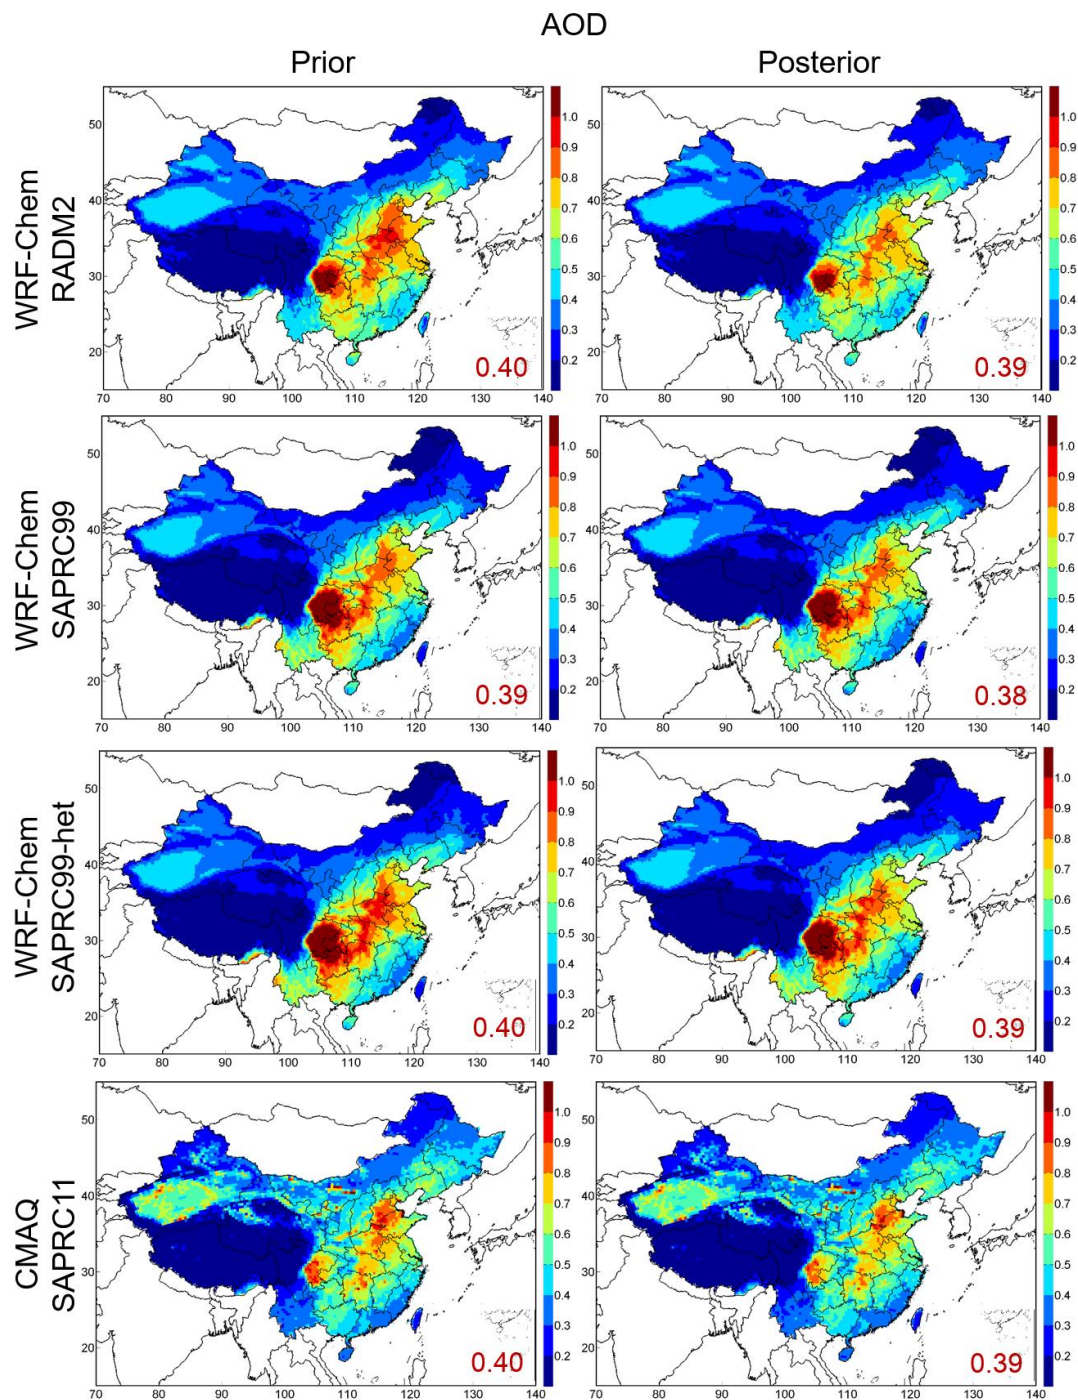

**Figure S8.** Annual AOD in China averaged for 2009. The left and right columns are from prior and posterior simulations using different models and mechanisms, respectively.

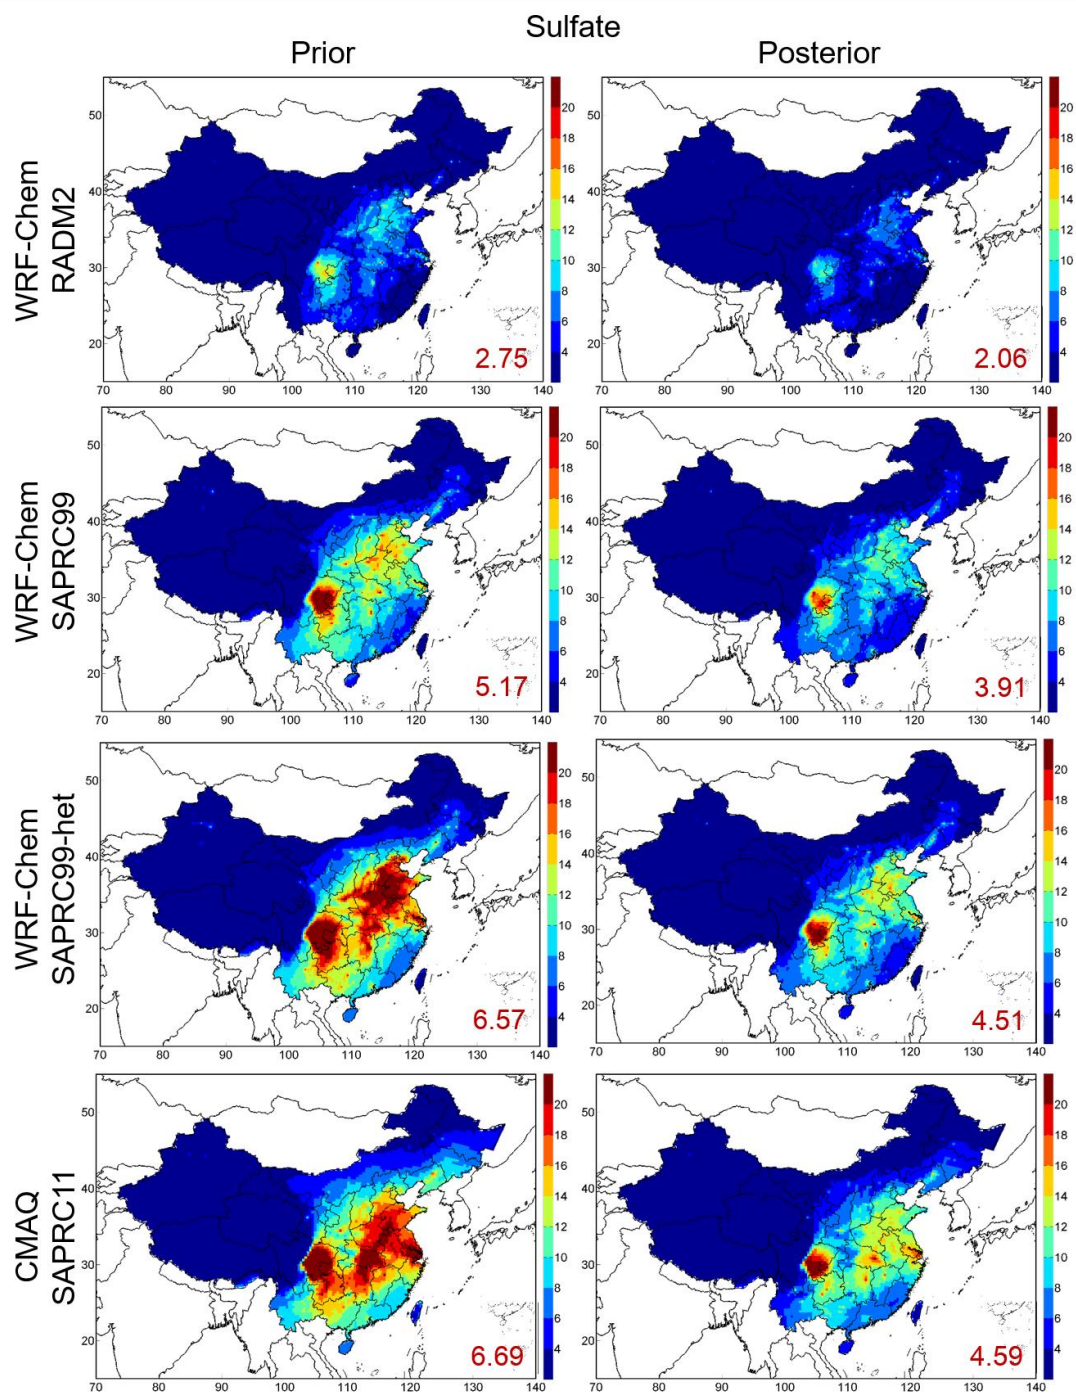

**Figure S9.** Simulated monthly surface sulfate ( $\mu\text{g m}^{-3}$ ) in China averaged for 2009 using different models and mechanisms. The left and right are from prior and posterior simulations, respectively.

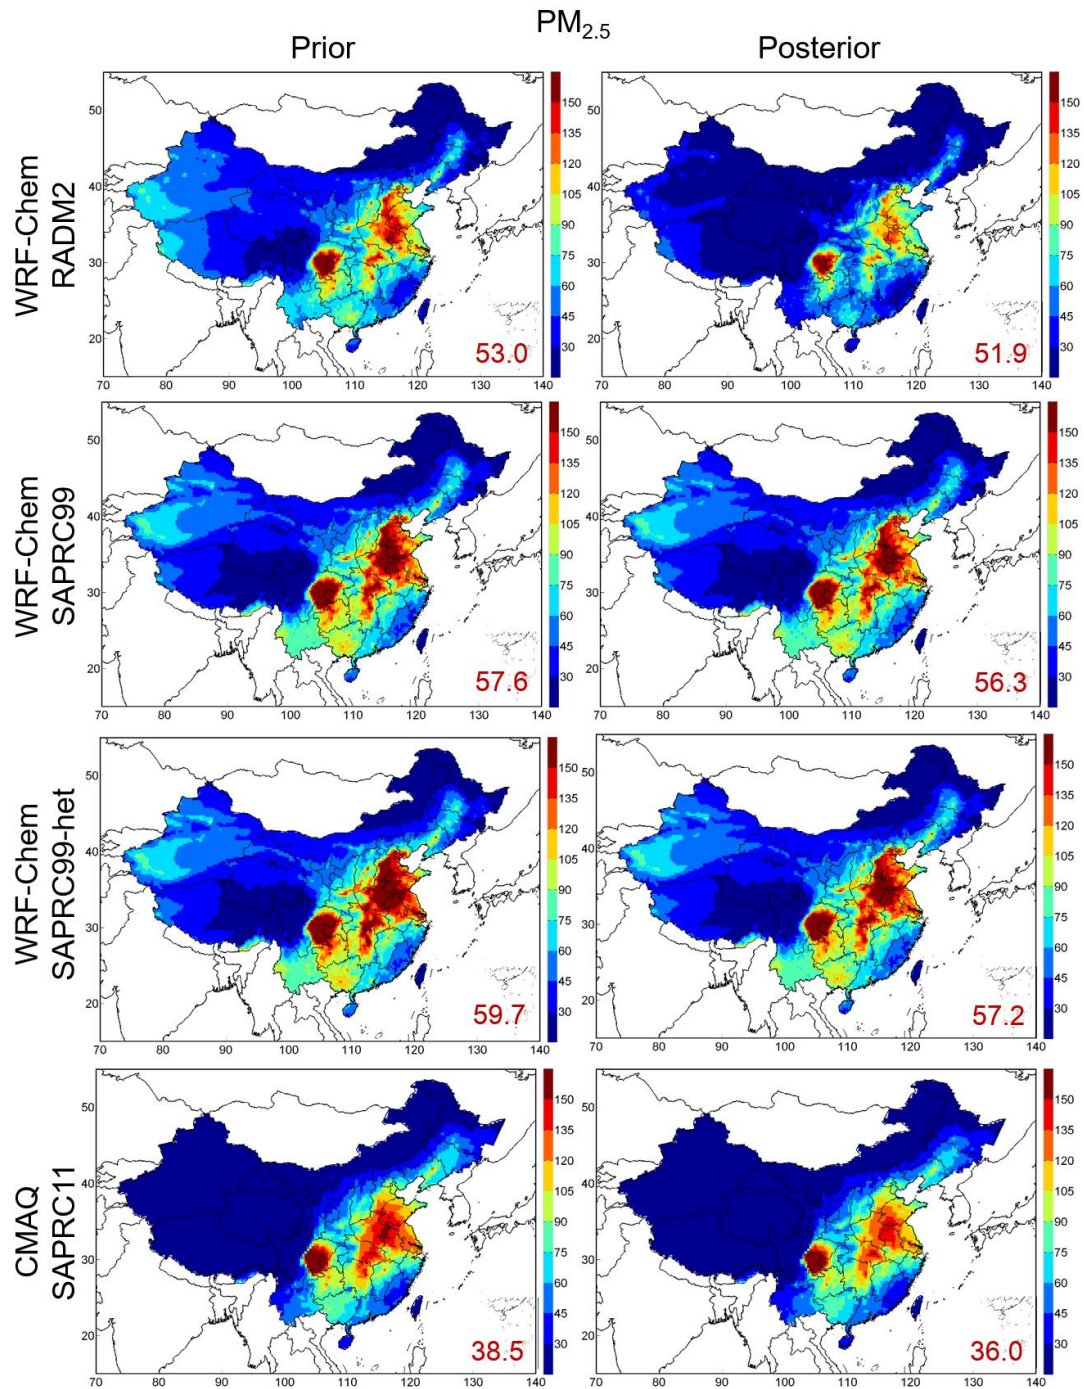

**Figure S10.** Simulated monthly surface PM<sub>2.5</sub> ( $\mu\text{g m}^{-3}$ ) in China averaged for 2009 using different models and mechanisms. The left and right are from prior and posterior simulations, respectively.

## Reference

- Binkowski, F.S. and S.J. Roselle (2003), Models-3 Community Multiscale Air Quality (CMAQ) model aerosol component: 1. Model description, *J. Geophys. Res.*, 108(D6), 4183, doi:10.1029/2001JD001409.
- Carlton, A.G., P.V. Bhave, S.L. Napelenok, E.O. Edney, G. Sarwar, R.W. Pinder, G.A. Pouliot, M. Houyoux, 2010: Model Representation of Secondary Organic Aerosol in CMAQv4.7. *Env. Sci. & Technol.* 44 (22), 8553-8560.
- Carter, W.P.L. (2000a), Documentation of the SAPRC-99 Chemical Mechanism for VOC Reactivity Assessment. Report to the California Air Resources Board, Contracts 92e329 and 95e308.
- Carter, W.P.L. (2000b), Implementation of the SAPRC-99 Chemical Mechanism into the Models-3 Framework. Report to the United States Environmental Protection Agency.
- Carter, W.P.L. and G. Heo (2012), Development of revised SAPRC aromatics mechanisms. Final Report to the California Air Resources Board, Contracts No. 07-730 and 08-326.
- Easter, R.C., S.J. Chan, Y. Zhang, R.D. Saylor, E.G. Chapman, N.S. Laulainen et al. (2004), MIRAGE: Model description and evaluation of aerosols and trace gases. *J. Geophys. Res.*, 109: D20210. Doi:10.1029/2004JD004571.
- Foley, K.M., S.J. Roselle, K.W. Appel, P.V. Bhave, J.E. Pleim, T.L. Otte, et al. (2010), Incremental testing of the Community Multiscale Air Quality (CMAQ) modeling system version 4.7, *Geosci. Model Dev.*, 3, 205–226, doi.org/10.5194/gmd-3-205-2010.
- Liu, H., D.J. Jacob, I. Bey, and R.M. Yantosca (2001), Constraints from <sup>210</sup>Pb and <sup>7</sup>Be on wet deposition and transport in a global three-dimensional chemical tracer model driven by assimilated meteorological fields. *J. Geophys. Res.*, 106(D11), 12,109–12,128. 10.1029/2000JD900839
- Qu, Z., D. K. Henze, N. Theys, J. Wang, and W. Wang, Hybrid mass balance/4D-Var joint inversion of NO<sub>x</sub> and SO<sub>2</sub> emissions in East Asia, *J. Geophys. Res.-Atmosphere*, 124, 8203-8224, 2019.
- Schell, B., I.J. Ackermann, H. Hass, F.A. Binkowski and A. Ebel (2001), Modeling the formation of secondary organic aerosol within a comprehensive air quality model system. *J. Geophys. Res.*, 106: 28275-28293, 10.1029/2001JD000384.
- Stockwell, W.R., P. Middleton, J.S. Chang, X.Y. Tang (1990), The second generation regional acid deposition model chemical mechanism for regional air quality modeling, *J. Geophys. Res.*, 95, 10, 16343-16367.
- Wang, G.H., R.Y. Zhang, M.E. Gomez, L.X. Yang, M.L. Zamora et al. (2016), Persistent sulfate formation from London Fog to Chinese haze, *PNAS*, 113, 13630-13635, doi:10.1073/pnas.1616540113.
- Wang, Y., D.J. Jacob, and J.A. Logan (1998), Global simulation of tropospheric O<sub>3</sub>-NO<sub>x</sub>-hydrocarbon chemistry: 1. Model formulation. *J. Geophys. Res.*, 103(D9), 10,713–10,725. 10.1029/98JD00158.

- Wesely, M.L. (1989), Parameterization of surface resistances to gaseous dry deposition in regional-scale numerical models. *Atmos. Environ.*, 23(6), 1293–1304. 10.1016/0004-6981(89)90153-4.
- Zaveri, R.A., R.C. Easter and A.S. Wexler (2005), A new method for multicomponent activity coefficients of electrolytes in aqueous atmospheric aerosols. *J. Geophys. Res.*, 110: D02201. doi:10.1029/2004JD004681.
- Zaveri, R.A., R.C. Easter, J.D. Fast and L.K. Peters (2008), Model for Simulating Aerosol Interactions and Chemistry (MOSAIC), *J. Geophys. Res.*, 113, D13204, 10.1029/2007JD008782.
